# Supplementary material for: Colonization of Non-biodegradable and Biodegradable Plastics by Marine Microorganisms
Source: PubMed Central journal article supplement (PMC6058052; doi:10.3389/fmicb.2018.01571), 2018-07-18
Supplement: Table_1.pdf [file Table_1.pdf]

**Suppl. Table S1:** Number of reads for tag sequencing and alpha-diversity indexes (Chao1, Pielou, Shannon, Simpson) for the 4 plastic types (PE, OXO, AA-OXO, PHBV) and seawater (SW) samples. Underlined values correspond to the minimum; bold values correspond to the maximum.

| Sample | Day | Number of reads (N) | Chao 1       | Pielou       | Shannon      | Simpson (1- $\lambda$ ) |
|--------|-----|---------------------|--------------|--------------|--------------|-------------------------|
| SW     | D7  | 178                 | 259,4        | 0,616        | 3,191        | 0,920                   |
|        | D22 | 195                 | 292,5        | 0,594        | 3,129        | 0,910                   |
|        | D30 | 171                 | 230,4        | 0,605        | 3,111        | 0,916                   |
|        | D45 | 150                 | 201,0        | 0,607        | 3,039        | 0,917                   |
| PE     | D7  | 146                 | 185,0        | 0,660        | 3,288        | 0,929                   |
|        | D22 | 111                 | 124,0        | <b>0,770</b> | 3,628        | 0,953                   |
|        | D30 | 202                 | 229,3        | 0,734        | <b>3,894</b> | <b>0,958</b>            |
|        | D45 | 154                 | 183,5        | 0,710        | 3,577        | 0,938                   |
| OXO    | D7  | <u>97</u>           | <u>112,8</u> | 0,658        | 3,009        | 0,914                   |
|        | D22 | 175                 | 211,4        | 0,672        | 3,473        | 0,937                   |
|        | D30 | 199                 | 250,0        | 0,668        | 3,535        | 0,928                   |
|        | D45 | 171                 | 217,4        | 0,638        | 3,283        | 0,920                   |
| AA-OXO | D7  | 183                 | 249,5        | 0,572        | 2,98         | 0,881                   |
|        | D22 | 158                 | 222,2        | <u>0,550</u> | <u>2,784</u> | 0,867                   |
|        | D45 | 199                 | 228,3        | 0,642        | 3,396        | 0,916                   |
| PHBV   | D7  | 139                 | 152,0        | 0,608        | 3,002        | 0,873                   |
|        | D22 | <b>214</b>          | 271,6        | 0,642        | 3,447        | 0,926                   |
|        | D45 | 208                 | <b>322,0</b> | 0,601        | 3,206        | <u>0,863</u>            |
